# Supplementary material for: Food-related engineered nanoparticles and food-grade TiO2 impact the metabolism of a human commensal bacterial strain in physiologically relevant conditions
Source: Royal Society of Chemistry journal article supplement (doi:10.1039/d2en00685e), 2022-11-22
Supplement: d2en00685e1.pdf [file d2en00685e1.pdf]

## Supplementary Information

### **Food-related engineered nanoparticles and food-grade TiO<sub>2</sub> impact the metabolism of a human commensal bacterial strain in physiologically relevant conditions**

Yirong Zhang,<sup>1,2</sup> Wenqian Huang,<sup>1,2</sup> Minjie Li,<sup>3</sup> Fangfang Li,<sup>2,3</sup> Lingxiangyu Li,<sup>4</sup> Monika Mortimer,<sup>2,3</sup>\* Liang-Hong Guo<sup>2,3\*</sup>

<sup>1</sup>College of Life Science, China Jiliang University, Hangzhou, Zhejiang 310018, China

<sup>2</sup>Institute of Environmental and Health Sciences, China Jiliang University, Hangzhou, Zhejiang 310018, China

<sup>3</sup>College of Quality and Safety Engineering, China Jiliang University, Hangzhou, Zhejiang 310018, China

<sup>4</sup>School of Environment, Hangzhou Institute for Advanced Study, University of Chinese Academy of Sciences, Hangzhou, Zhejiang 310024, China

\*Corresponding authors: Monika Mortimer and Liang-Hong Guo

E-mails: [mmortimer@cjl.u.edu.cn](mailto:mmortimer@cjl.u.edu.cn), [lhguo@cjl.u.edu.cn](mailto:lhguo@cjl.u.edu.cn)

**Table S1.** Primers used in this study.

| Target gene | Forward and reverse primers                                               | Amplicon (bp) |
|-------------|---------------------------------------------------------------------------|---------------|
| <i>salA</i> | F: 5'- AAGGGAGAATGATTGCCATGAA-3'<br>R: 5'GAGTTTGGACAGTCATCAGTAATAGTTG- 3' | 144           |
| <i>sboA</i> | F:5'-TCTCGTTGAGATTGAAGCAATGA-3'<br>R:5'-TGCGACATTTCGTGTGAAATGG-3'         | 112           |
| <i>sboG</i> | F:5'- GCGGTCACGGAATTTGATAG-3'<br>R:5'-TTTTTAGCATACCTTTTTATGGATCA-3'       | 290           |
| <i>sboK</i> | F:5'- GGCTGGGCAGGGTATAAGAT-3'<br>R:5'-TTTGCAAGTGTCCAAAATGAA-3'            | 134           |
| <i>gyrA</i> | F:5'- GGCAATCAACCCATTTTGACG -3'<br>R:5'- CGAAGGTGAGACCATTCAAACAG -3'      | 148           |

Note: SalA<sup>36</sup>, SalB (*sboA*, *sboG*, *sboK*)<sup>35</sup>.

**Table S2.** Polydispersity indices (PDI) of dynamic light scattering (DLS) measurements of NPs in different media.

| Nanoparticles               | PDI in ultrapure water | PDI in rich growth medium (THB) | PDI in artificial saliva | PDI in "spent" artificial saliva |
|-----------------------------|------------------------|---------------------------------|--------------------------|----------------------------------|
| Ag                          | 0.4 ± 0.06             | 0.3 ± 0.04                      | 0.7 ± 0.15               | 1.0 ± 0                          |
| SiO <sub>2</sub>            | 0.5 ± 0.08             | 0.4 ± 0.05                      | 0.2 ± 0.06               | 0.4 ± 0.03                       |
| TiO <sub>2</sub>            | 0.7 ± 0.27             | 0.9 ± 0.10                      | 0.6 ± 0.03               | 0.9 ± 0.23                       |
| Food-grade TiO <sub>2</sub> | 0.2 ± 0.01             | 0.1 ± 0.1                       | 0.1 ± 0.04               | 0.8 ± 0.19                       |

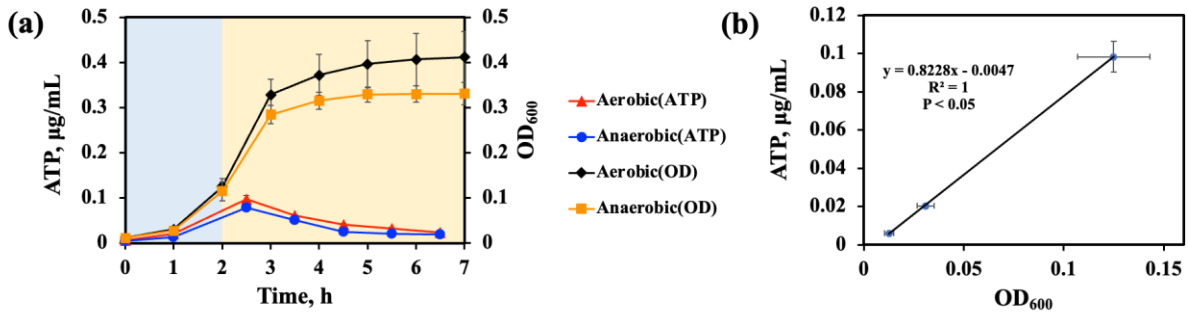

**Figure S1.** Comparison of growth of *S. salivarius* K12 in rich growth medium (THB) measured by optical density at 600 nm (OD<sub>600</sub>) and ATP quantification. (a) Aerobic and anaerobic growth of *S. salivarius* K12 in THB, measured either by OD<sub>600</sub> or ATP quantification. The data points within the left-side blue area were used to calculate specific growth rates after transforming the values to natural logarithms (Table S3). (b) Plot of ATP concentration and OD<sub>600</sub> of *S. salivarius* K12 after growth in THB, demonstrating significant positive correlation between ATP and cell concentration in bacterial cultures over the exponential growth phase. The data points are the average of 3 replicates and the error bars indicate standard deviations. When error bars are not visible, the standard deviations were small and the error bars are hidden by the data points.

**Table S3.** Specific growth rates (h<sup>-1</sup>) of *S. salivarius* K12 calculated based on the optical density (OD<sub>600</sub>) or ATP concentrations during growth in rich growth medium (THB) in aerobic or anaerobic conditions. The Student's t-test analysis indicated no statistically significant differences in the specific growth rates ( $p > 0.05$ ).

| Method            | Aerobic     | Anaerobic   |
|-------------------|-------------|-------------|
| OD <sub>600</sub> | 1.18 ± 0.05 | 1.17 ± 0.06 |
| ATP content       | 1.05 ± 0.05 | 1.16 ± 0.11 |

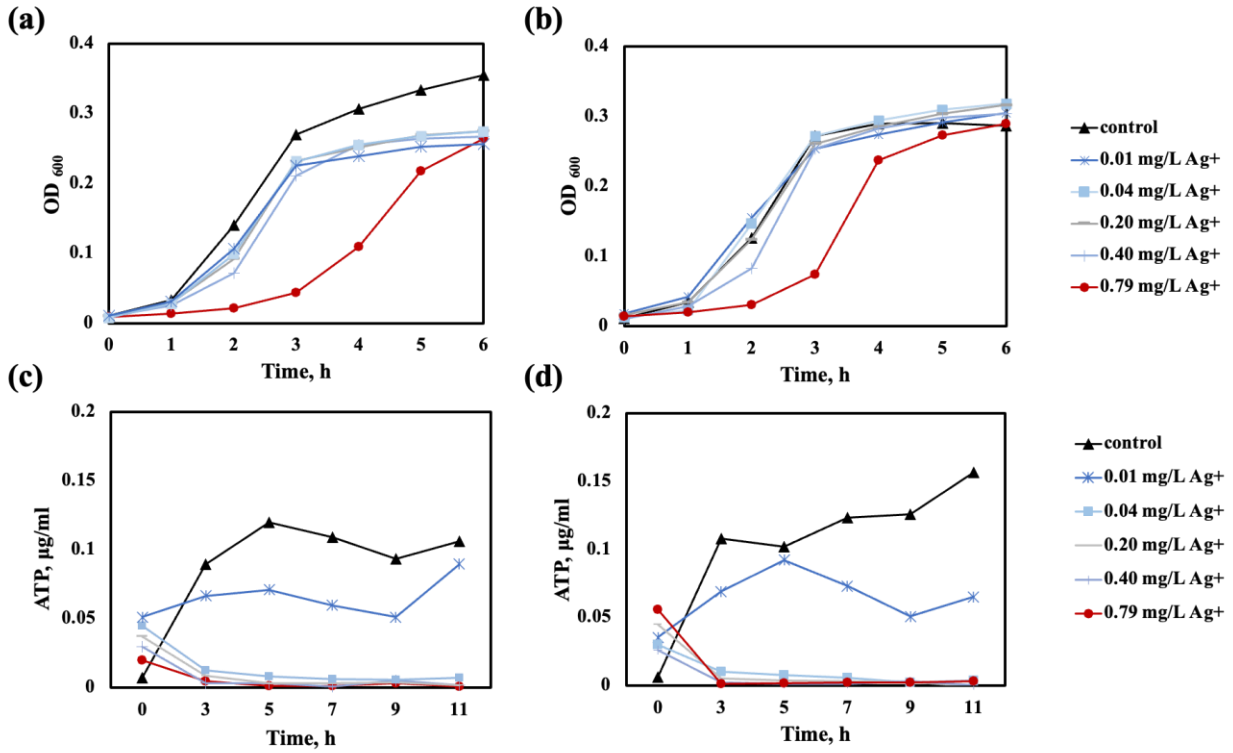

**Figure S2.** Growth of *S. salivarius* K12 with and without AgNO<sub>3</sub> (at 0.0125, 0.0625, 0.3125, 0.625, 1.25 mg/L; corresponding Ag concentrations: 0.01, 0.04, 0.20, 0.40, 0.79 mg/L) in (a, b) rich growth medium (THB) based on optical density and (c, d) artificial saliva based on ATP concentrations in (a, c) aerobic or (b, d) anaerobic conditions.

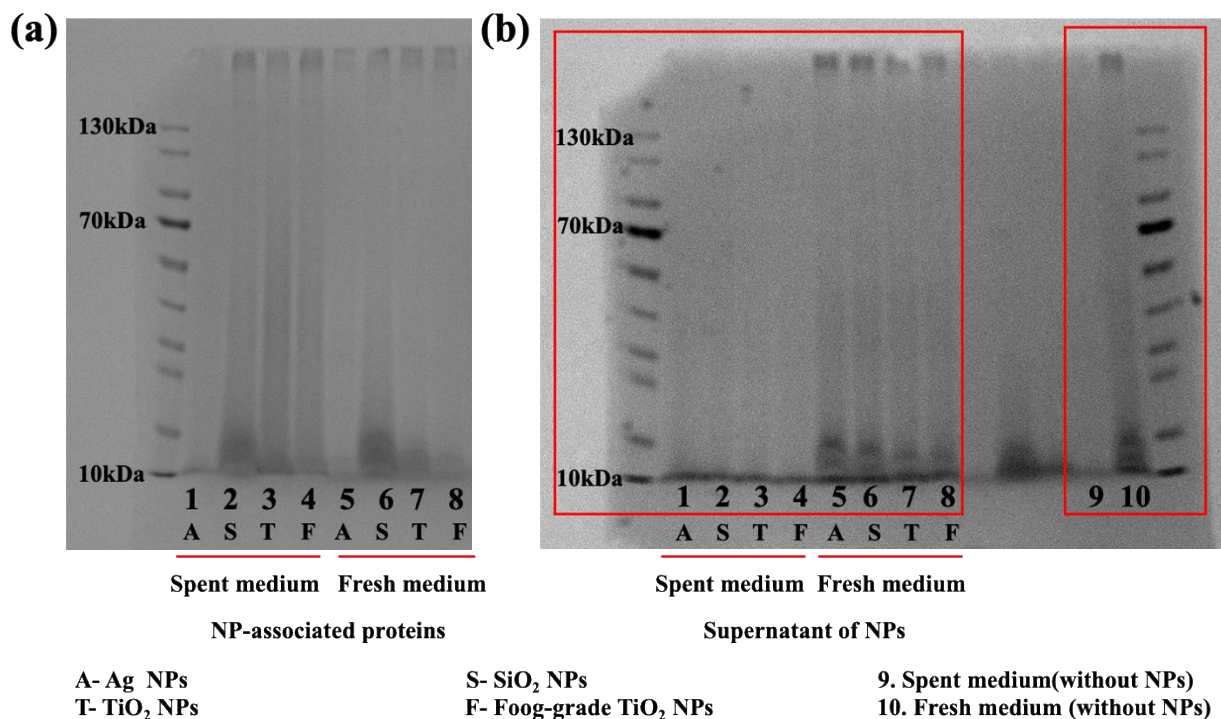

**Figure S3.** SDS-PAGE of (a) NP-associated proteins and (b) proteins in the supernatants of NPs after incubation in spent and fresh artificial saliva at 37°C, 200 rpm for 24 h. “Spent” artificial saliva refers to the medium that was inoculated with *S. salivarius* K12, incubated at 37°C, 200 rpm for 18 h, then centrifuged at 12,000 g for 10 min to remove bacteria. “Fresh” artificial saliva refers to the control medium in preparation of spent artificial saliva (i.e., artificial saliva incubated at 37°C, 200 rpm for 18 h, then centrifuged at 12,000 g for 10 min).

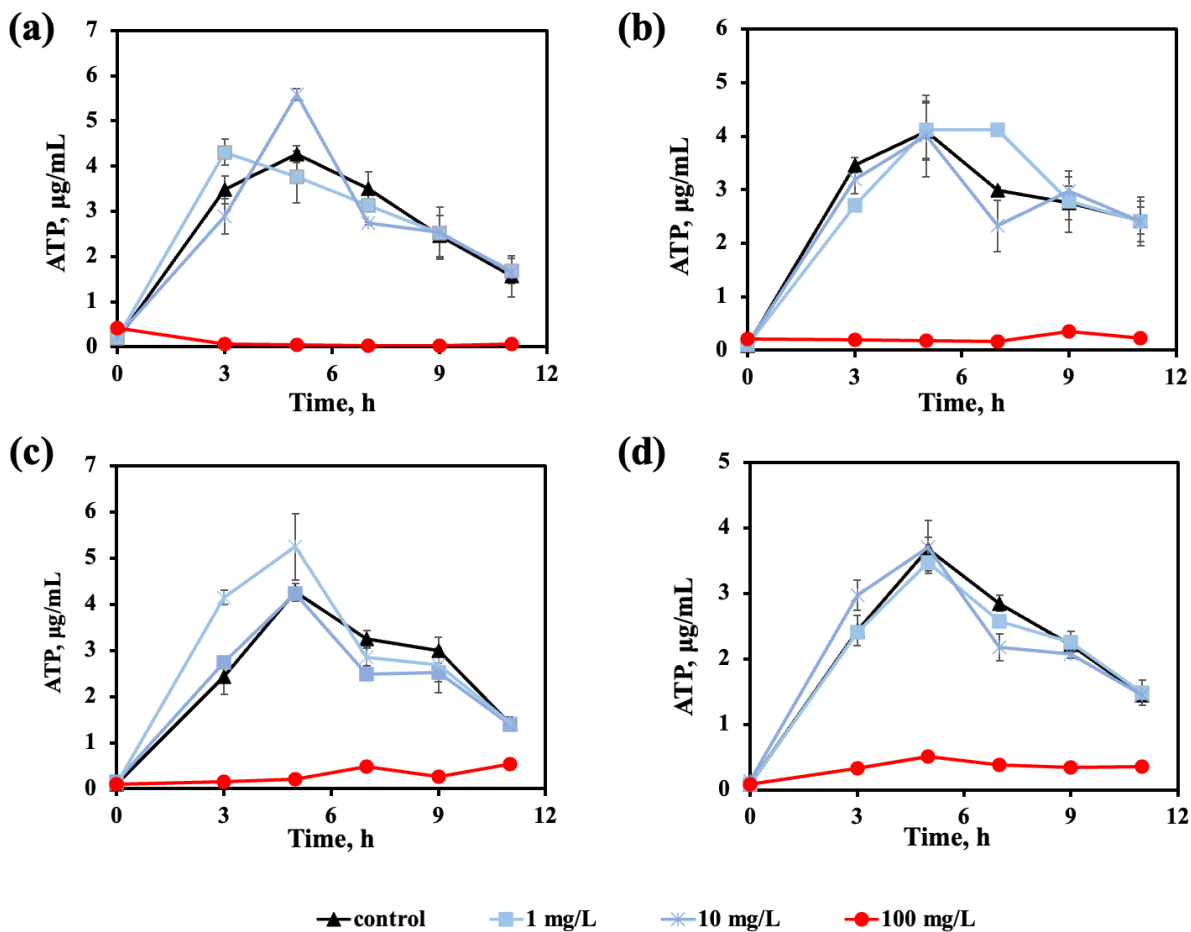

**Figure S4.** Growth of *S. salivarius* K12 with and without transformed (a) Ag NPs, (b) SiO<sub>2</sub> NPs, (c) TiO<sub>2</sub> NPs, and (d) food-grade TiO<sub>2</sub> at 1, 10 or 100 mg/L. Bacteria were grown aerobically at 37°C and ATP was used as a proxy for cell numbers during the exponential growth phase.

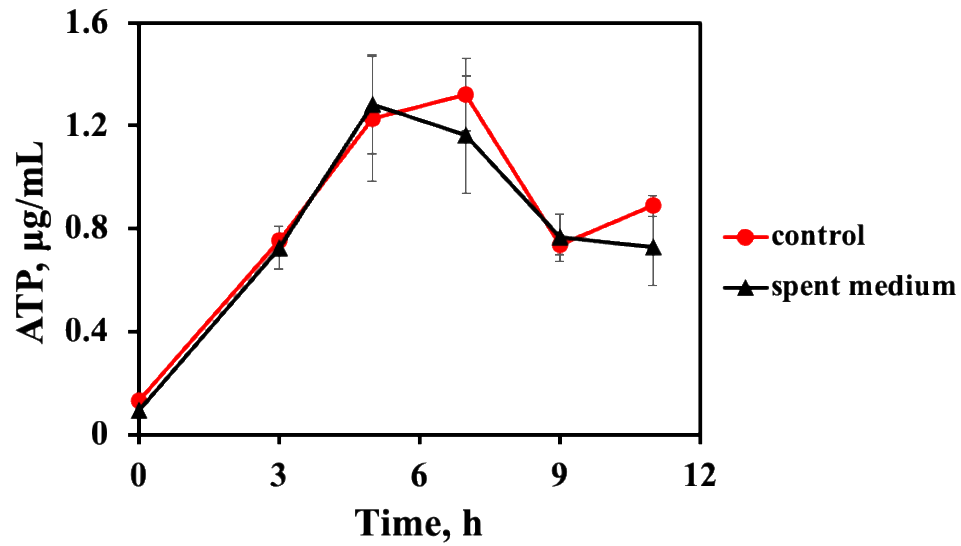

**Figure S5.** Growth of *S. salivarius* K12 in spent artificial saliva (spent medium) and fresh artificial saliva (control). Bacteria were grown aerobically at 37°C and ATP was used as a proxy for cell numbers. The overlapping growth curves during the exponential growth phase (0-5h) indicate similar growth rates in spent and fresh artificial saliva, suggesting that there was a sufficient amount of nutrients in the spent medium to support growth of *S. salivarius* fresh inoculum.
